# Supplementary material
Source: Frontiers journal article supplement (https://www.frontiersin.org/articles/372397)
Supplement: Image_1.PDF [file Image_1.PDF]

## Supplementary Material

# The *Staphylococcus aureus* Two-Component System AgrAC Displays Four Distinct Genomic Arrangements That Delineate Genomic Virulence Factor Signatures

Kumari Sonal Choudhary<sup>1</sup>, Nathan Mih<sup>1,2</sup>, Jonathan Monk<sup>1</sup>, Erol Kavvas<sup>1</sup>, James T. Yurkovich<sup>1,2</sup>, George Sakoulas<sup>3</sup>, Bernhard O. Palsson<sup>1,2,3\*</sup>

<sup>1</sup>Systems Biology Research Group, Department of Bioengineering, University of California, San Diego, CA

<sup>2</sup>Bioinformatics and Systems Biology Program, University of California, San Diego

<sup>3</sup>Department of Pediatrics, University of California, San Diego

\*Correspondence:

Bernhard O. Palsson

[palsson@eng.ucsd.edu](mailto:palsson@eng.ucsd.edu)

## SUPPLEMENTARY FIGURE

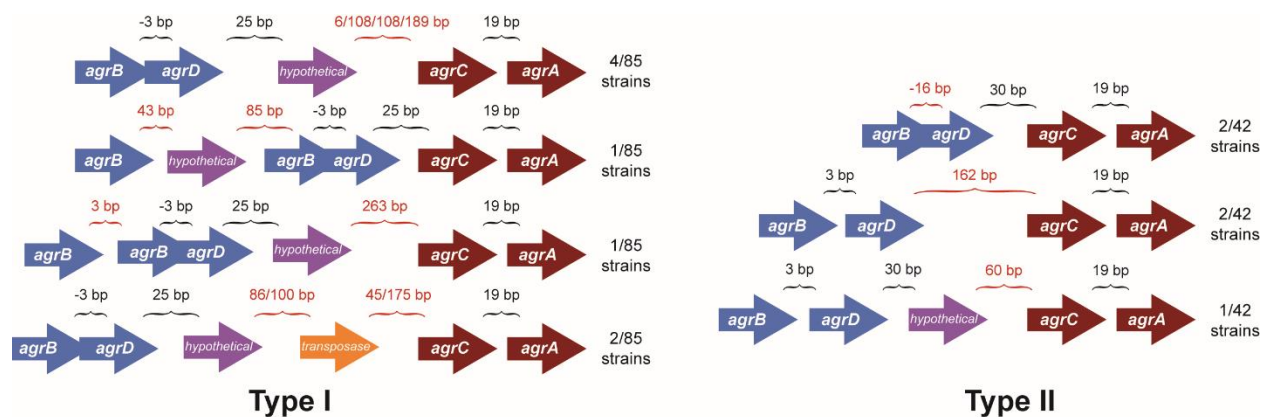

**Figure 1. Variations in the canonical arrangement of *agr* locus in type I and type II strains. Intergenic distances marked in red agree with the canonical arrangement.**
