# Supplementary material
Source: Frontiers journal article supplement (https://www.frontiersin.org/articles/372397)
Supplement: Image_2.PDF [file Image_2.PDF]

*Supplementary Material*

**The *Staphylococcus aureus* Two-Component System AgrAC Displays Four Distinct Genomic Arrangements That Delineate Genomic Virulence Factor Signatures**

Kumari Sonal Choudhary<sup>1</sup>, Nathan Mih<sup>1,2</sup>, Jonathan Monk<sup>1</sup>, Erol Kavvas<sup>1</sup>, James T. Yurkovich<sup>1,2</sup>, George Sakoulas<sup>3</sup>, Bernhard O. Palsson<sup>1,2,3\*</sup>

<sup>1</sup>Systems Biology Research Group, Department of Bioengineering, University of California, San Diego, CA

<sup>2</sup>Bioinformatics and Systems Biology Program, University of California, San Diego

<sup>3</sup>Department of Pediatrics, University of California, San Diego

**\*Correspondence:**

Bernhard O. Palsson

[palsson@eng.ucsd.edu](mailto:palsson@eng.ucsd.edu)

**SUPPLEMENTARY FIGURE**

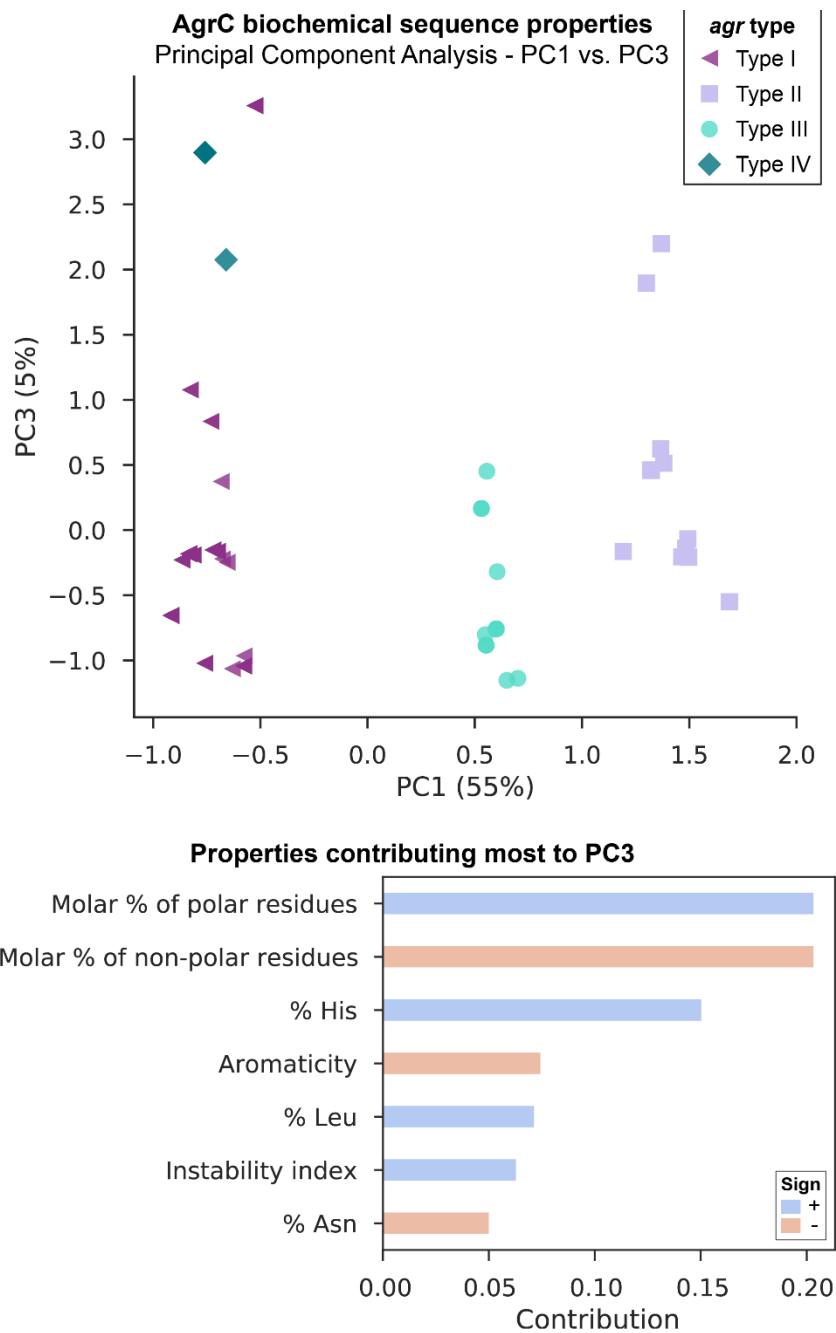

**Figure 2: Principal component 1 vs 3, and properties that contribute most to PC3.** PC3 interestingly separates out the six type I proteins (top purple triangles in the PC1 vs PC3 plot).
